# Supplementary figures and images for: Healthcare professionals in COVID-19-intensive care units in Norway: preparedness and working conditions: a cohort study
Source: HighWire-hosted journal article supplement (doi:10.1136/bmjopen-2021-049135), 2021-10-01

Supplementary file 4. Figure 1. Health care professionals' symptoms experienced in COVID-ICU

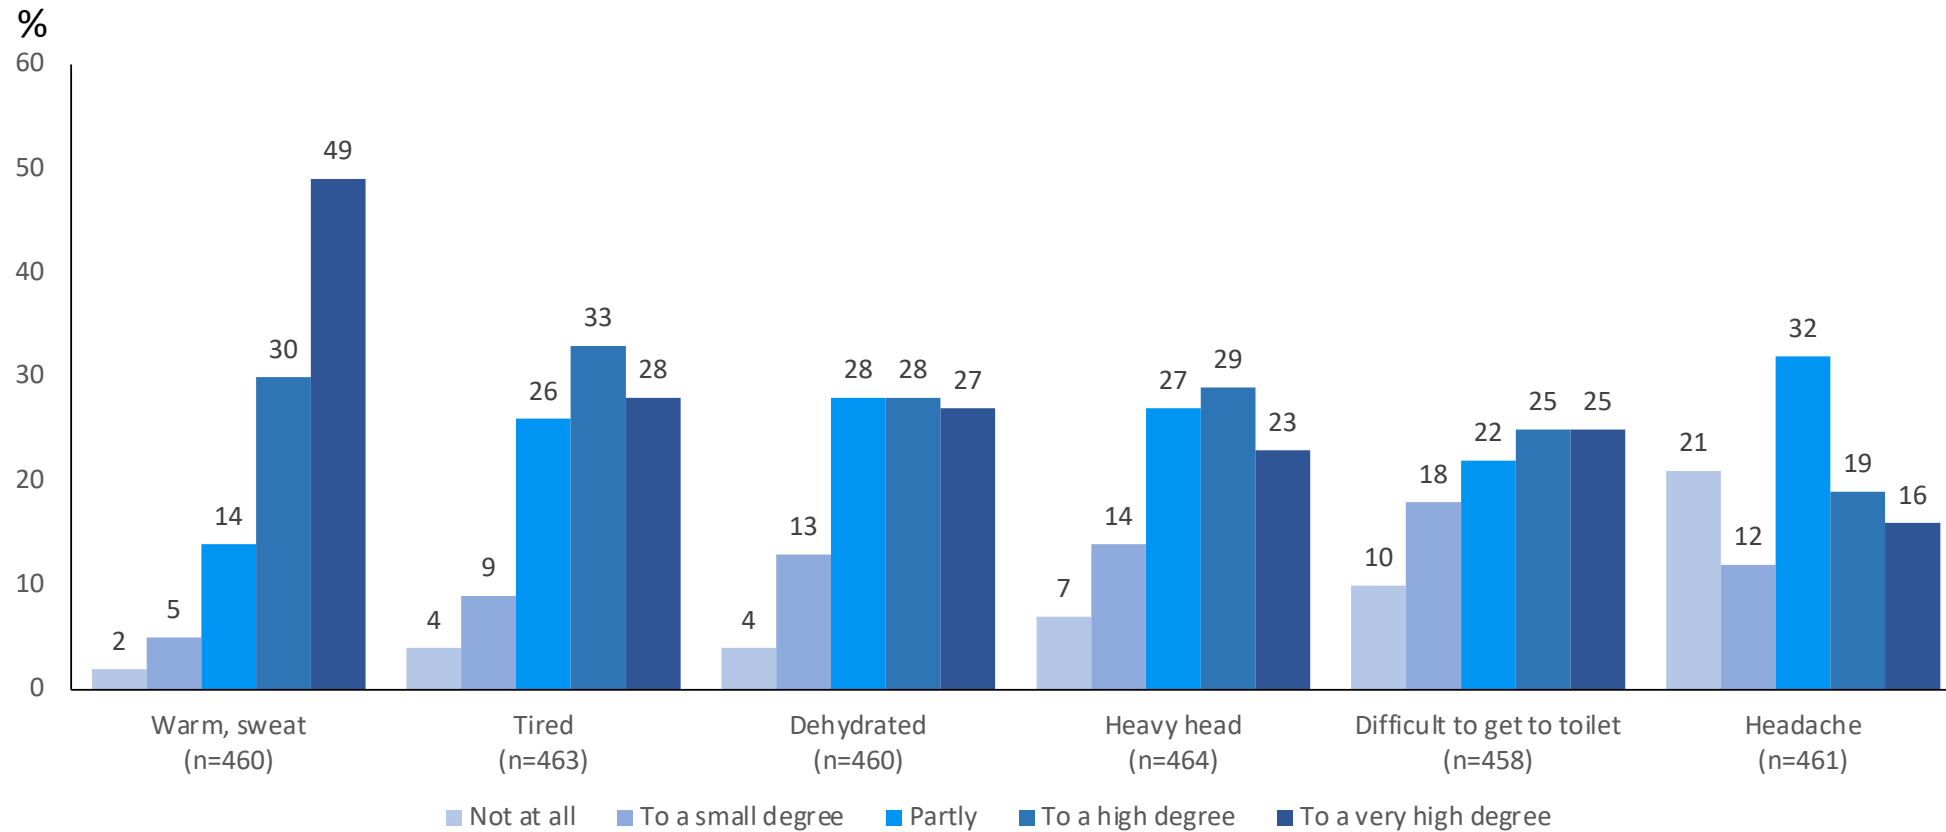

Supplement: bmjopen-2021-049135supp004_data_supplement.pdf [file bmjopen-2021-049135supp004_data_supplement.pdf]
